# Supplementary material
Source: PubMed Central journal article supplement (PMC3969464)
Supplement: 10815_2014_178_MOESM2_ESM.pdf [file 10815_2014_178_MOESM2_ESM.pdf]

**Online Resource 2 Cleavage characteristics (A) and time-points for finishing cleavage events (B) in the 3 PN and 2 PN embryos (only IVF embryos cultured at reduced oxygen; 21 3 PN IVF embryos cultured at high oxygen were excluded).**

| A*                                                                           | 3PN                                           |                                 | 2PN                                           |                                | p-value              |
|------------------------------------------------------------------------------|-----------------------------------------------|---------------------------------|-----------------------------------------------|--------------------------------|----------------------|
|                                                                              | N <sub>cases</sub> /N <sub>analyzed</sub> (%) |                                 | N <sub>cases</sub> /N <sub>analyzed</sub> (%) |                                |                      |
| Aberrant 1 <sup>st</sup> cytokinesis                                         | 23/36 (64)                                    |                                 | 28/184 (15)                                   |                                | <0.001               |
| 1 <sup>st</sup> cytokinesis, >30 min (Prolonged 1 <sup>st</sup> cytokinesis) | 12/36 (33)                                    |                                 | 29/186 (16)                                   |                                | 0.02                 |
| Cleavage 1 to 3 cells <1 hour (Early cleavage to 3 cells)                    | 26/34 (76)                                    |                                 | 16/183 (9)                                    |                                | <0.001               |
| Cleavage 3 to 5 cells <1 hour (Early cleavage to 5 cells)                    | 19/30 (63)                                    |                                 | 18/181 (10)                                   |                                | <0.001               |
| Multi-nucleation at the 2-cell stage <sup>a</sup> .                          | 1/10 (10)                                     |                                 | 17/208 (10)                                   |                                | 0.59                 |
| B**                                                                          | 3PN                                           |                                 | 2PN                                           |                                | p-value <sup>c</sup> |
|                                                                              | N                                             | Time-point / hours <sup>b</sup> | N                                             | Time-point/ hours <sup>b</sup> |                      |
| 2-cell stage (1st division/1st cleavage cycle)                               | 35                                            | 29.0 (26.9;32.6)                | 189                                           | 28.2 (25.9;31.3)               | 0.07                 |
| 3-cell stage (2nd division)                                                  | 34                                            | 32.1 (27.2;40.4)                | 199                                           | 38.6 (35.6;42.2)               | 0.001                |
| 4-cell stage (3rd division/2nd cleavage cycle)/hours.                        | 33                                            | 39.5 (37.2;43.9)                | 192                                           | 39.8 (36.9;44.3)               | 0.98                 |
| 5-cell stage (4th division )                                                 | 30                                            | 42.5 (39.0;48.3)                | 192                                           | 52.1 (47.8;56.9)               | <0.001               |
| 6-cell stage (5th division)                                                  | 28                                            | 49.2 (39.4;57.8)                | 181                                           | 53.4 (50.0;58.3)               | 0.002                |
| 7/8-cell stage (6th/7th division/3 <sup>rd</sup> cleavage cycle)             | 22                                            | 55.1 (50.0;63.0)                | 165                                           | 58.1 (53.5;65.6)               | 0.14                 |

T0 was defined as time of adding sperm to the dish. N<sub>cases</sub> refers to number of embryos where the event was observed. N<sub>analyzed</sub> refers to the number of embryos that was evaluated. N<sub>analyzed</sub> became smaller with time as some embryos arrested development in almost each cell cycle.

A\*. The hypotheses of no difference between the fractions for 3 PN and 2 PN embryos were tested with Fishers exact test. a: Embryos with early cleavage from 1 to 3 cells (n=42) were not included in this evaluation.

B\*\*. b: Time-points are reported as medians with quartiles. c: The hypotheses of no difference between the median time-points for 3PN and 2 PN embryos were tested with Wilcoxon rank sum test. The time points for completion of 6<sup>th</sup> and 7<sup>th</sup> divisions were grouped together, as these divisions were often difficult to distinguish.
